# Supplementary material for: Sodium alginate decreases the permeability of intestinal mucus
Source: PubMed Central journal article supplement — Food Hydrocoll. 2016 Jan;52:749–55. doi: 10.1016/j.foodhyd.2015.08.004 (PMC4615136; doi:10.1016/j.foodhyd.2015.08.004), 2016-01
Supplement: mmc1.pdf [file mmc1.pdf]

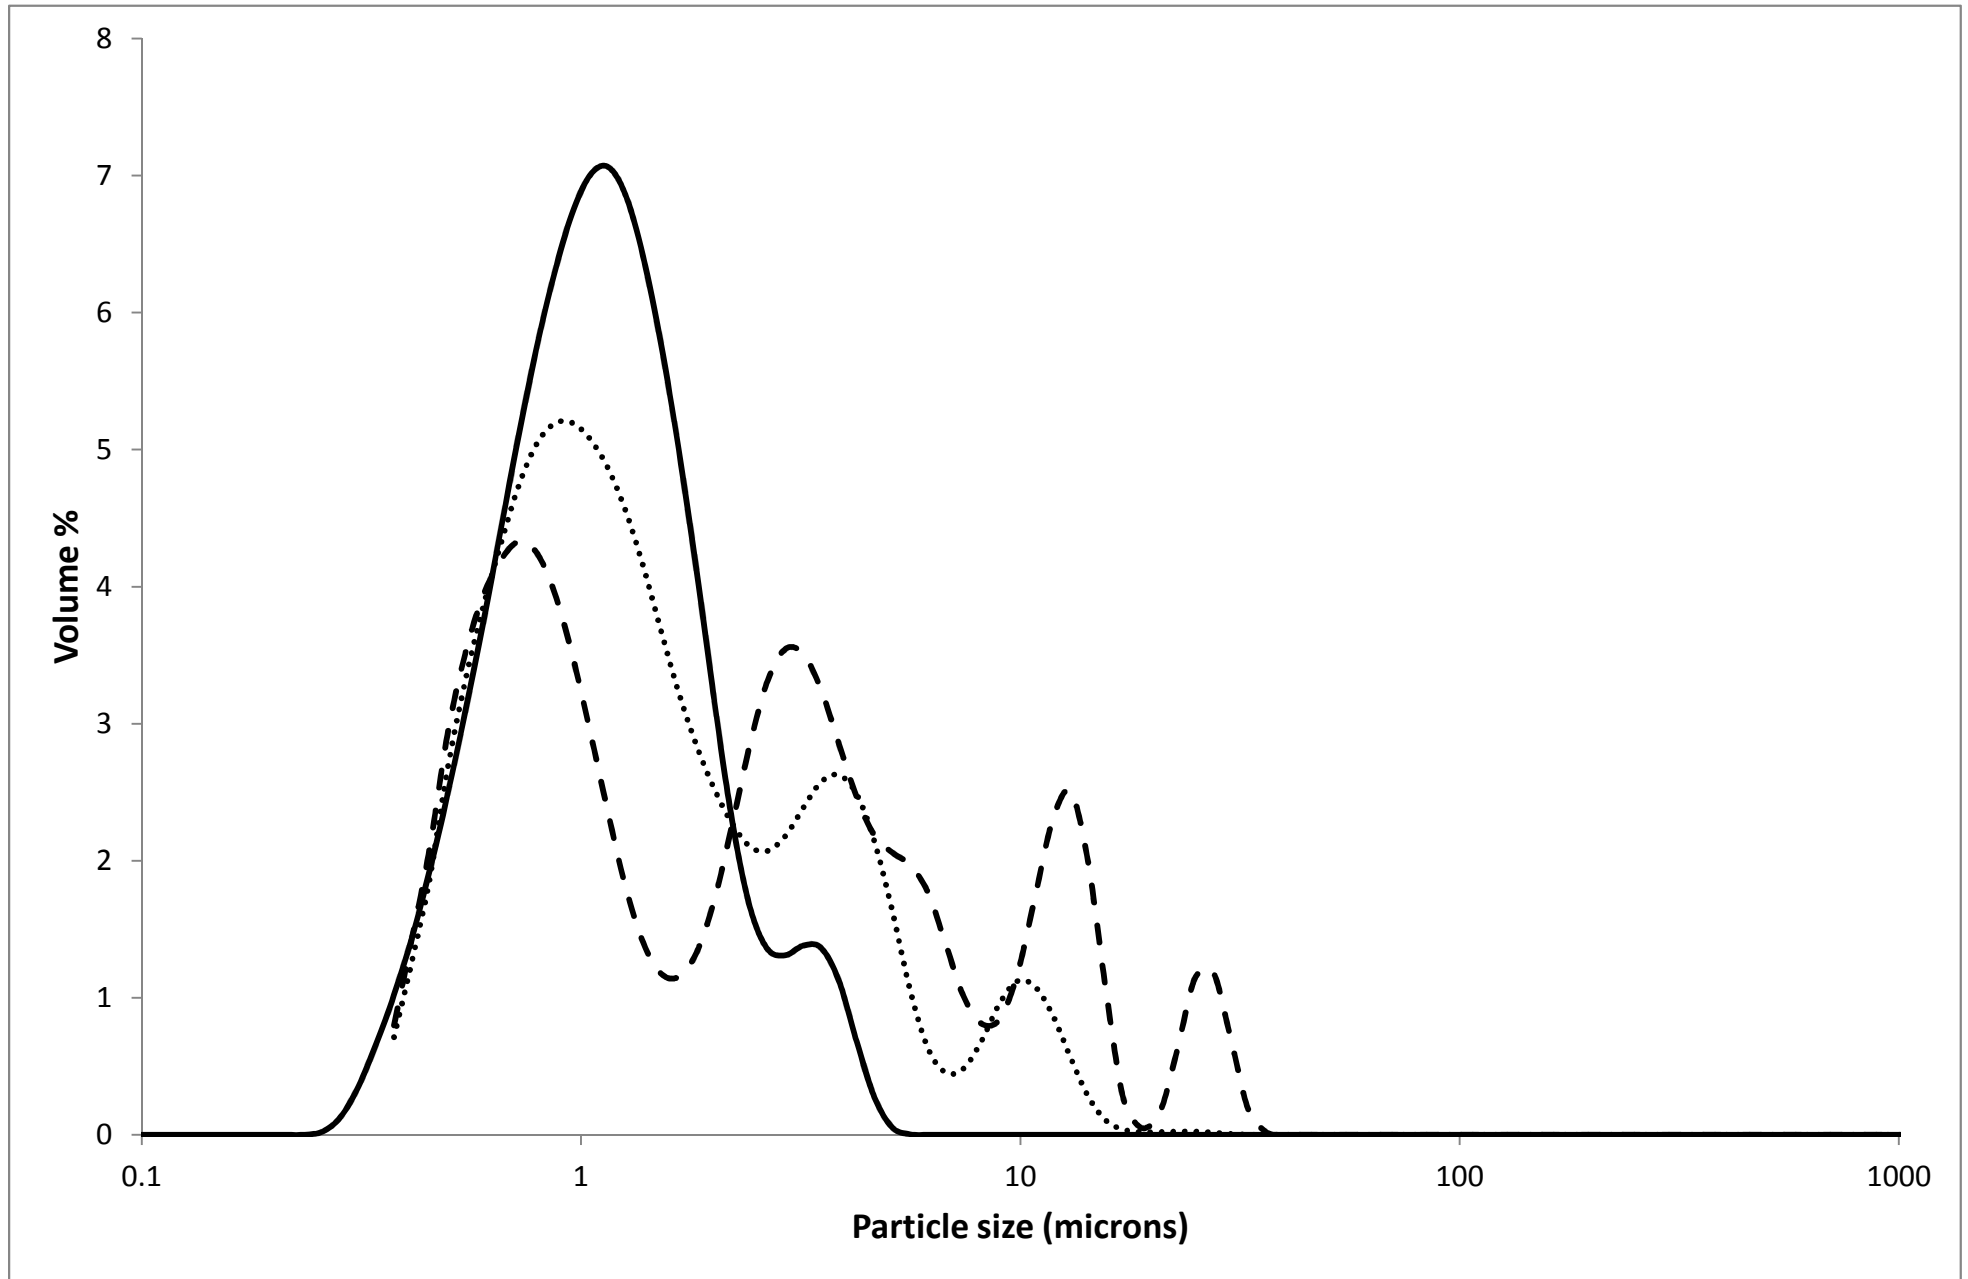

**Figure S1** The size distributions of the emulsions used to determine the effect of sodium alginate on the permeability of intestinal mucus. The starting emulsion is shown by the solid line; the same emulsion after gastric and 5 minutes duodenal digestion is the dotted line and the emulsion after gastric and 120 minutes duodenal digestion is shown as the dashed line.
